# Supplementary material for: Inference of differentiation time for single cell transcriptomes using cell population reference data
Source: PubMed Central journal article supplement (PMC5707349; doi:10.1038/s41467-017-01860-2), 2017-11-30
Supplement: 41467_2017_1860_MOESM1_ESM.pdf [file 41467_2017_1860_MOESM1_ESM.pdf]

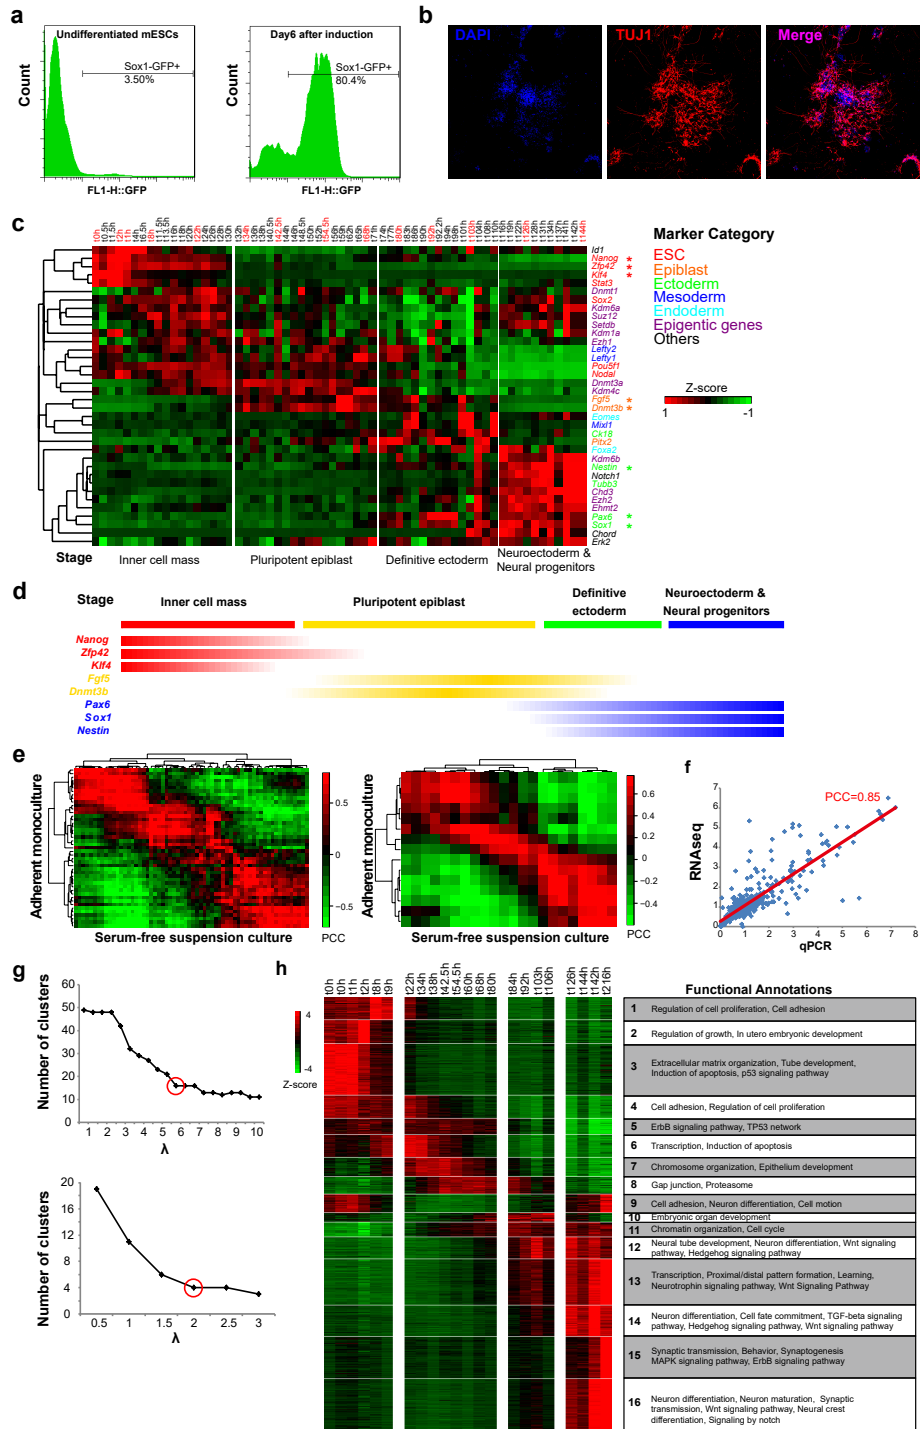

**Supplementary Figure 1. Assessing the efficiency of neural differentiation of mouse embryonic stem cells (mESCs) and inter-cell heterogeneity revealed by single-cell RNA-seq**

(a) Flow cytometry profiles of Sox1-GFP fluorescence.

(b) Immunostaining of TUJ1 3 days after the cells were replated onto PDL/laminin/fibronectin coated dishes (Methods).

- (c) Fluidigm qPCR gene expression profiles of marker genes representing pluripotency, epiblast, the three germ layers, epigenetic enzymes and neural differentiation. The genes marked with stars represent known markers for differentiation stages. The red-font time points were selected to perform cell population RNA-seq.
- (d) Marker genes' expression patterns used to define major differentiation stages.
- (e) Expression correlations across temporal marker genes measured by Fluidigm qPCR (left) or all detected genes by cell population RNA-seq (RPKM > 1 in at least 2 samples, right) at different time points during differentiation by two different methods, serum-free suspension culture (x-axis) and adherent monoculture (y-axis).
- (f) Correlation between marker genes' expression levels measured by RNA-seq and qPCR at the different time points.
- (g) The number of clusters under different lambda for cpDEGs and 22 differentiation time points using BIC-SKmeans is plotted, and the number of clusters at the turning point is selected.
- (h) Differentially expressed genes between every two samples identified by Cuffdiff from the cell population RNA-seq data (cpDEGs) are grouped into 16 gene clusters and 4 sample clusters by BIC-SKmeans.

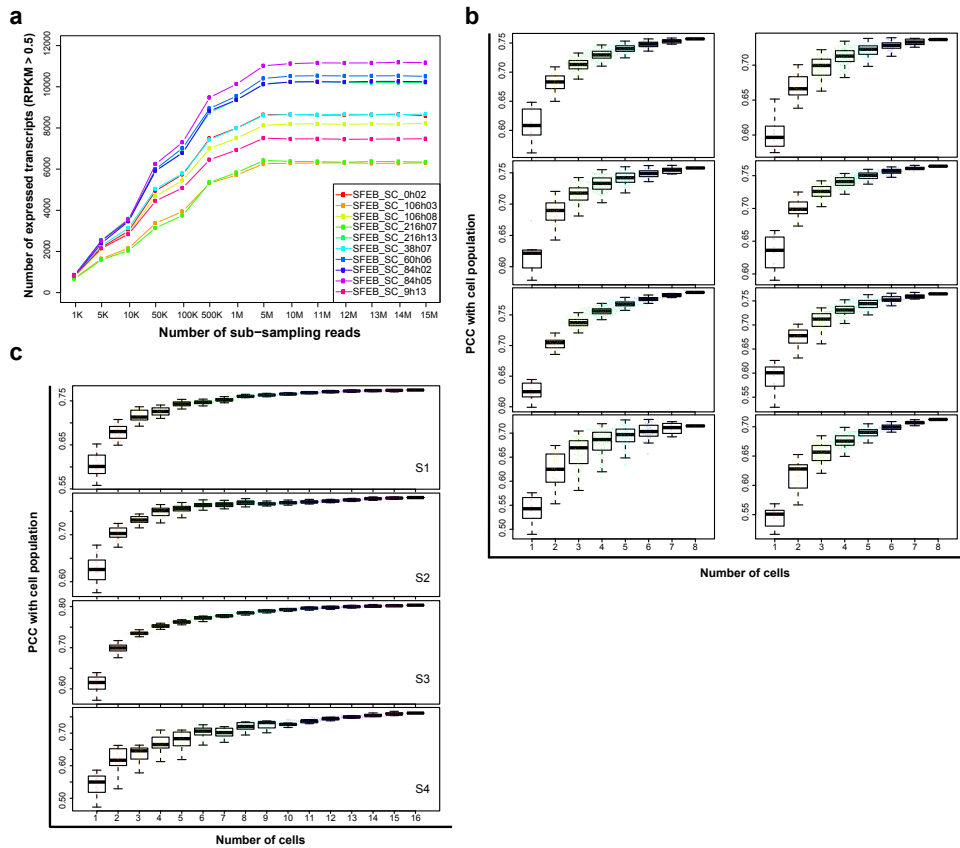

**Supplementary Figure 2. Assessing the sampling saturation of scRNA-seq using cpRNA-seq as references**

(a) Saturation analysis. X-axis is number of sub-sampling reads, and y-axis is number of transcripts with expression (RPKM > 0.5).

(b - c) scRNA-seq sampling saturation curves for each stage (i) or time point (j). In each panel, x-axis shows the number of randomly selected single cells, and y-axis shows the PCC of gene expression levels between cell population sample and averaged single cells based on all expressed genes.

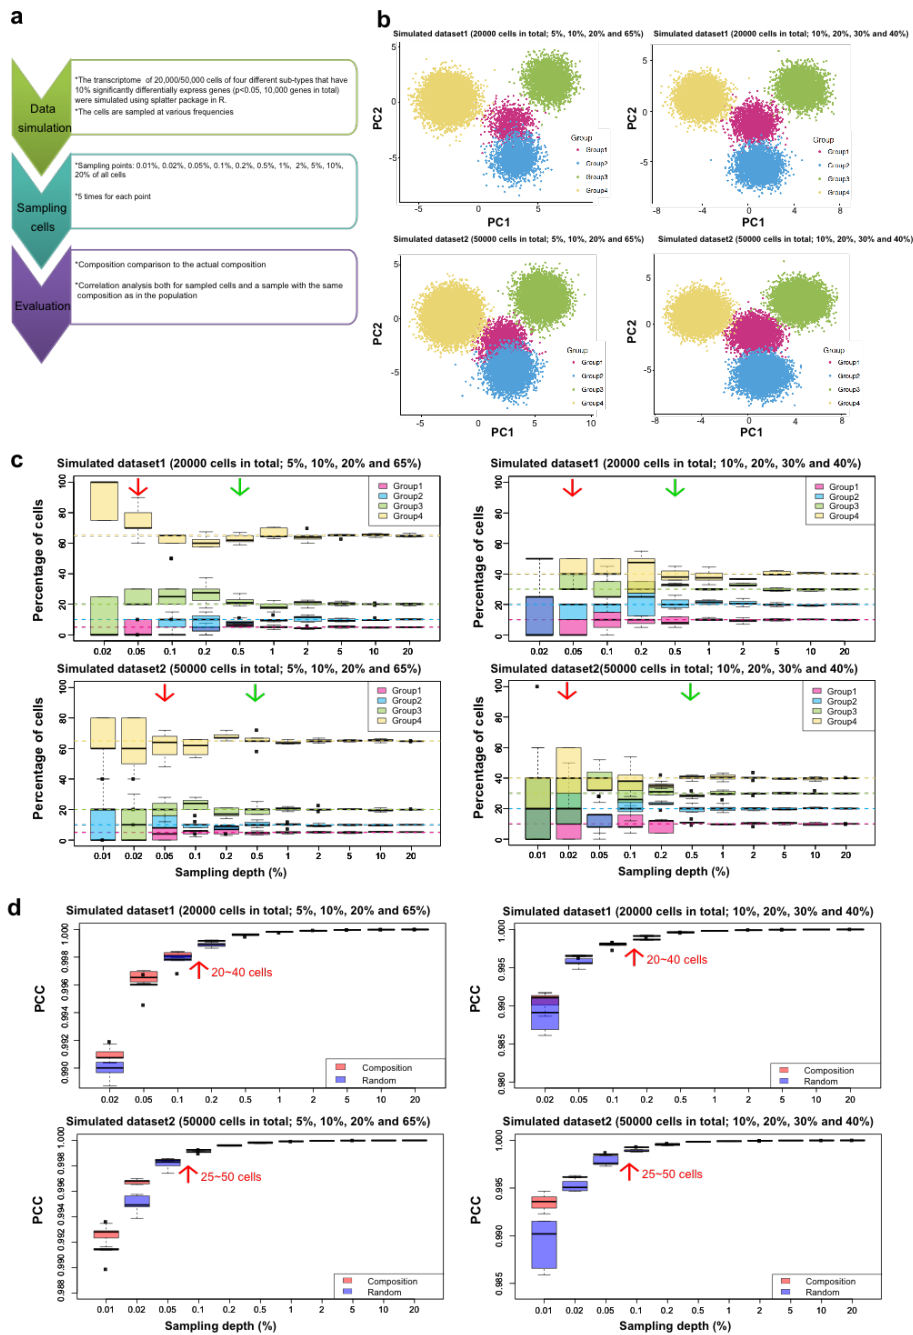

### Supplementary Figure 3. Sampling of simulated data

(a) Workflow of simulation analysis.

(b) PCA based on the simulated single cells with 10% significantly differentially express in a total of 10,000 genes ( $p < 0.05$ ) using the splatter<sup>1</sup> software. Top: simulation with 20,000 cells; bottom: simulation with 50,000 cells; left: a cell population with four sub-types of 5%, 10%, 20% and 65%; right: a cell

population with four sub-types of 10%, 20%, 30% and 40%. The four colors represent four sub-types of cells.

(c) Composition analysis (top: simulation with 20,000 cells; bottom: simulation with 50,000 cells; left: a cell population with four sub-types of 5%, 10%, 20% and 65%; right: a cell population with four sub-types of 10%, 20%, 30% and 40%). The four colors represent four sub-types of cells, and the dash lines show the actual proportions of the subtypes in simulated data. Red arrows mark the starting points when all four cell types can be detected. Green arrows mark the starting points when the cell compositions become the same as the actual compositions.

(d) Correlation (measured by PCC) of the total transcriptome of sampled single cells to the original cell population. Top: simulation with 20,000 cells; bottom: simulation with 50,000 cells; left: a cell population with four sub-types of 5%, 10%, 20% and 65%; right: a cell population with four sub-types of 10%, 20%, 30% and 40%. Arrows mark the starting positions where similarities of single-cell to cell-population data start to plateau, and become similar between composition-fixed sampling and random sampling.

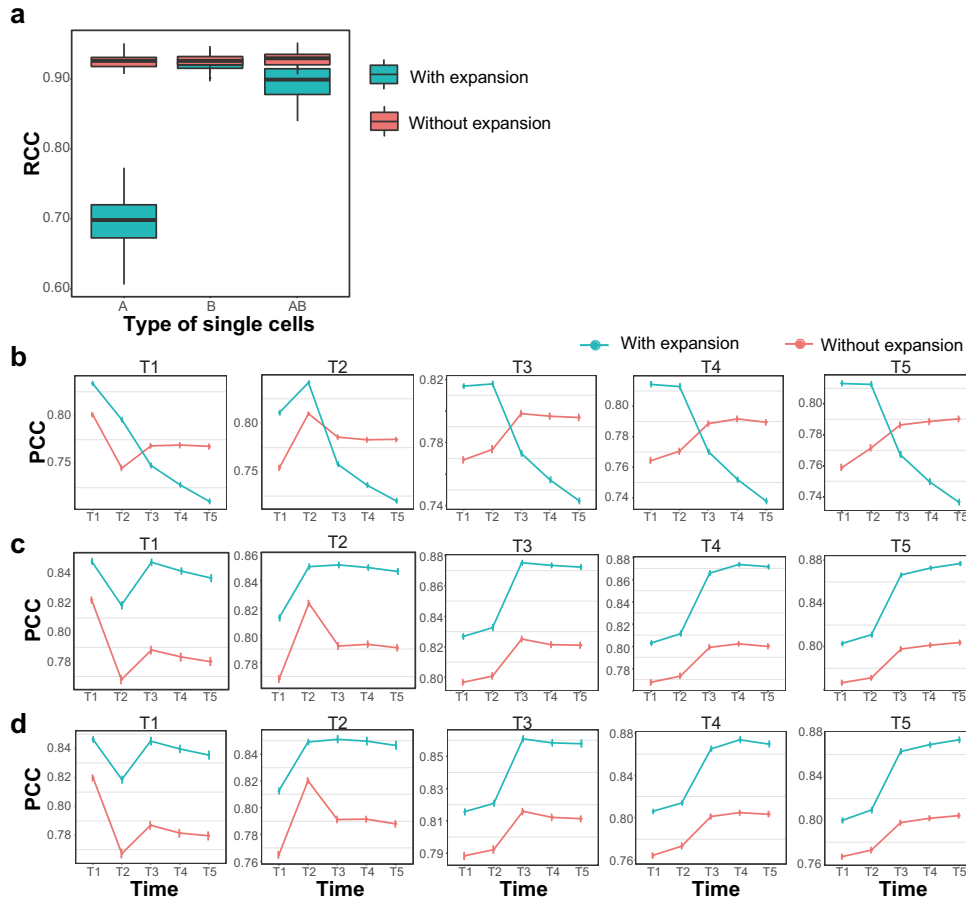

**Supplementary Figure 4. Comparison of temporal trajectory mapping by modeling differentiation with or without unbalanced cell population expansion**

A type and B type of cells have 20% of 10,000 genes differentially expressed ( $p < 0.05$ , generated using the splatter<sup>1</sup> package). Then the two sub-populations of single cells change at each timepoint, a total of 5 timepoints with 1% of genes change significantly at each timepoint ( $p < 0.05$ , generated using the splatter<sup>1</sup> package). From the starting time point T1 with 50% of A type of cells and 50% B type of cells, A and B cells either remain at the constant 50% throughout T1 to T5 (without expansion), or B cells expand linearly to 95% at T5 (with expansion). (a) Spearman's correlation coefficient (RCCs) between the true order of single cell and the order predicted by iCpSc.CpToScTime package. (b-d) PCC of all single cells of A (panel b), B (panel c) and A and B types combined (panel d) to the simulated cell population profiles at each time point in the no expansion model and the expansion model, respectively.

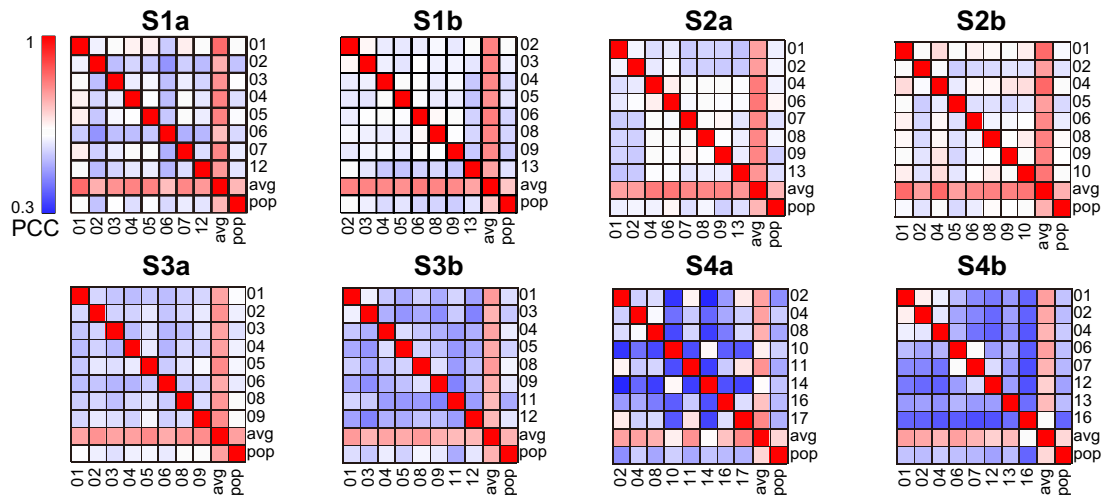

**Supplementary Figure 5. Global correlations in gene expression between two single cells, or between the single cell average and cell population at each time point during mESC neural differentiation**

Shown are the Pearson correlation coefficients (PCCs) between global expression profiles across all expressed genes (RPKM > 0.5 in at least eight samples). All correlations were calculated on log-transformed expression RPKM.

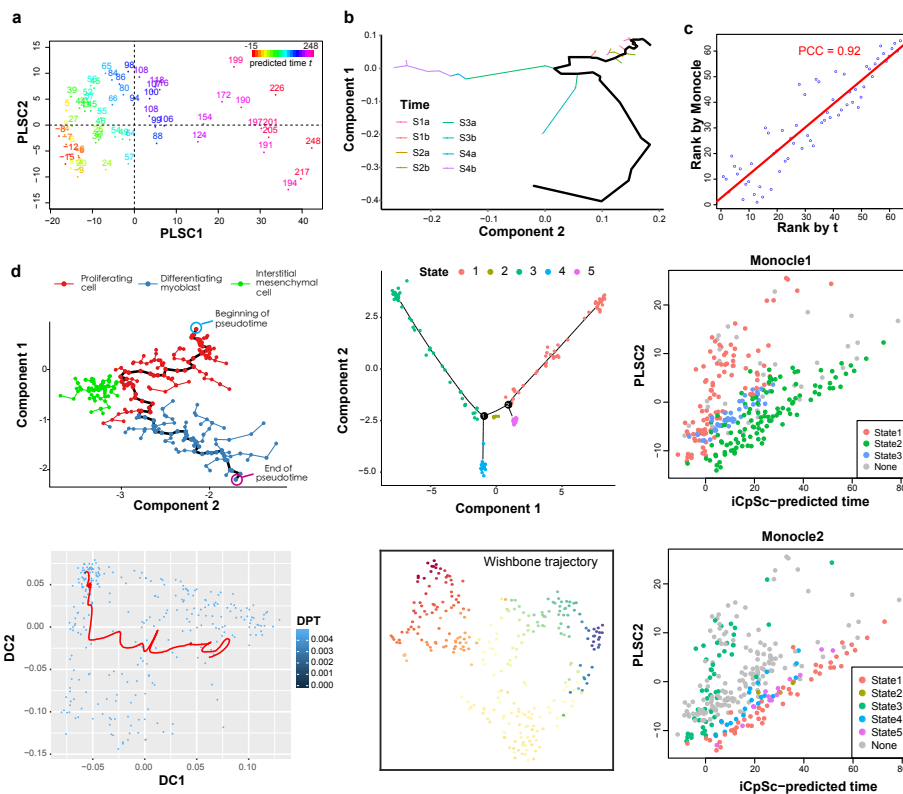

## Supplementary Figure 6. Ordering single cells by predicted differentiation time $t$

(a) Temporal order displayed by single cells when projected on the first and second Partial Least Square (PLS) regression components of single cell RNA-seq profiles. The predicted differentiation time  $t$  of each single cell is shown.

(b) Prediction of differentiation trajectory by Monocle.

(c) The rank correlation of single cell orders given by PLSC1, 2 based predicted differentiation time  $t$  (or by SVR) with orders given by Monocle.

(d) Branching trajectories detected by the four (pseudo-) time prediction methods. Upper panels, trajectories and states detected by Monocle1 and 2. Middle panels, iCpSc-predicted time against PLSC2 displays three branches that diverge as time proceeds, with cells colored by the Monocle1 and 2 states, respectively. Lower panels, the trajectory identified by DPT with no clear branching detected (left) and the trajectory identified by Wishbone (right).



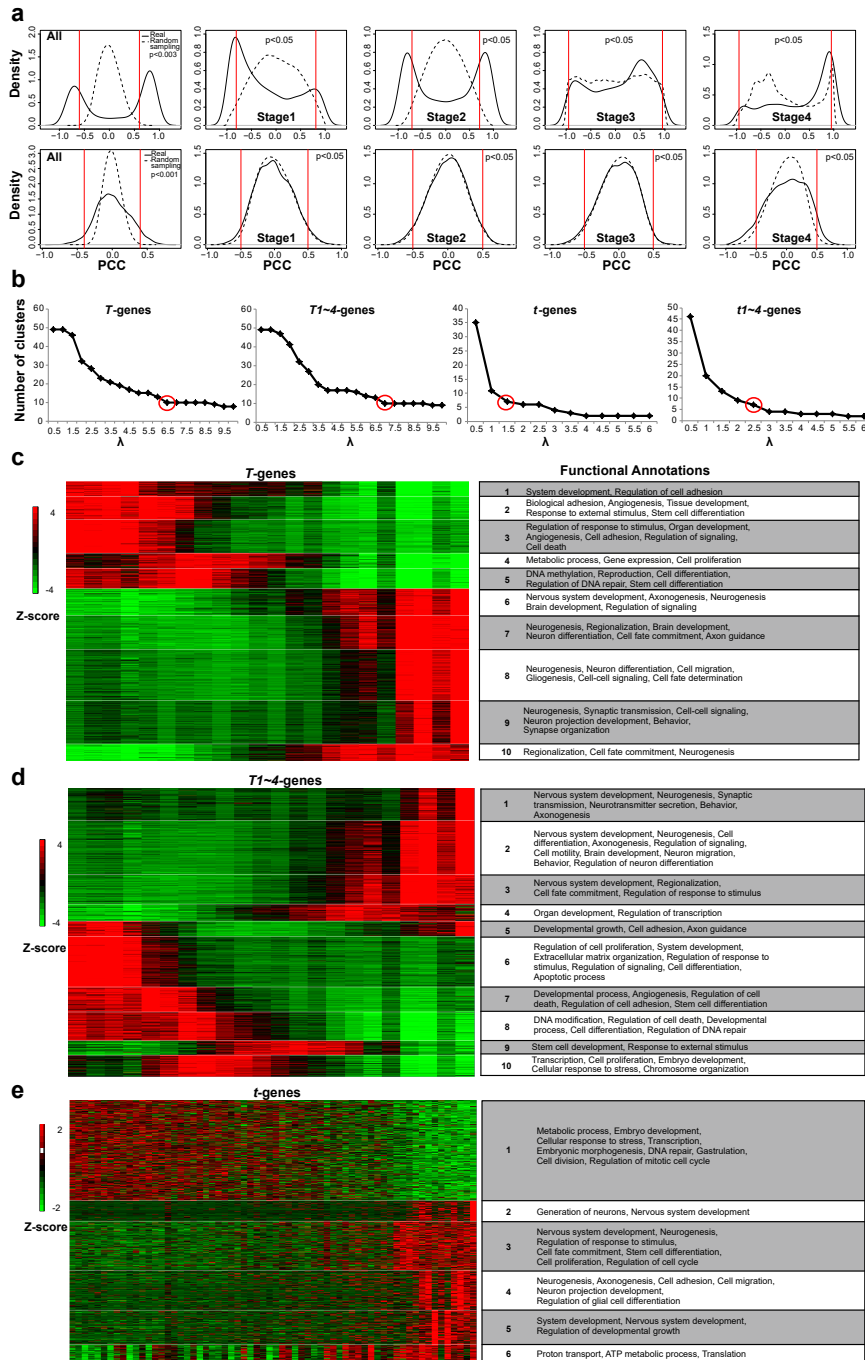

**Supplementary Figure 7. Gene expression associated with differentiation time**

(a) Distributions of gene expression PCCs to the fitted or predicted differentiation time  $T$  or  $t$  in real data or shuffled data across all samples or

stage-specific samples. Solid lines stand for real data of all genes, and dashed lines stand for the distribution based on 1000 times of sample randomization. Red vertical lines mark the positions of PCC cutoffs used for each data set.

(b) Searching for the optimum number of clusters to identify the expression patterns of  $T$ -genes and  $T1\sim 4$ -genes across cell population time points,  $t$ -genes and  $t1\sim 4$ -genes across single cells. The number of clusters under different lambda in BIC-SKmeans is plotted, and the number of clusters at the turning point is selected.

(c - e) The expression patterns of  $T$ - or  $T1\sim 4$ - or  $t$ -genes across fitted differentiation time  $T$  in cell population or predicted differentiation time  $t$  in single cell, and the representative enriched functional terms for each cluster.

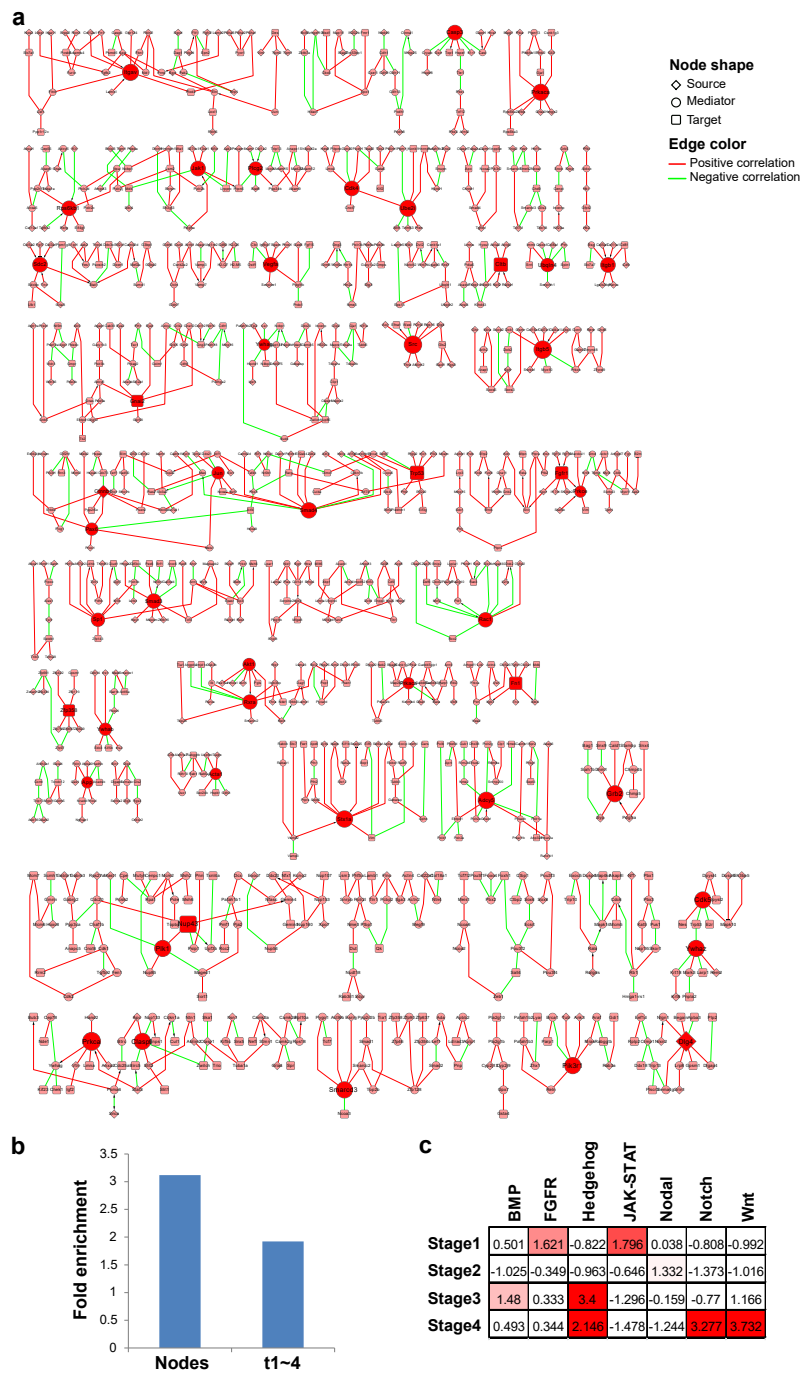

**Supplementary Figure 8. Inferring a regulatory network for mESC neural differentiation timing by eResponseNet and CSI networks**

(a) All three stages transition eResponseNets' components that contain hub genes. Only hubs and their first-degree interactors are included in the networks.

(b). Fold enrichment of cell cycle genes in eResponseNet nodes and

*t1~4*-genes, respectively.

(c) Significance of association of 7 development-related signaling pathways genes with the stage specifically highly expressed genes in each differentiation stage. Significance was determined by Fisher's exact test.  $-\log_{10}$  transformed Bonferroni corrected p-values are shown, and highlighted red when p-value < 0.05.

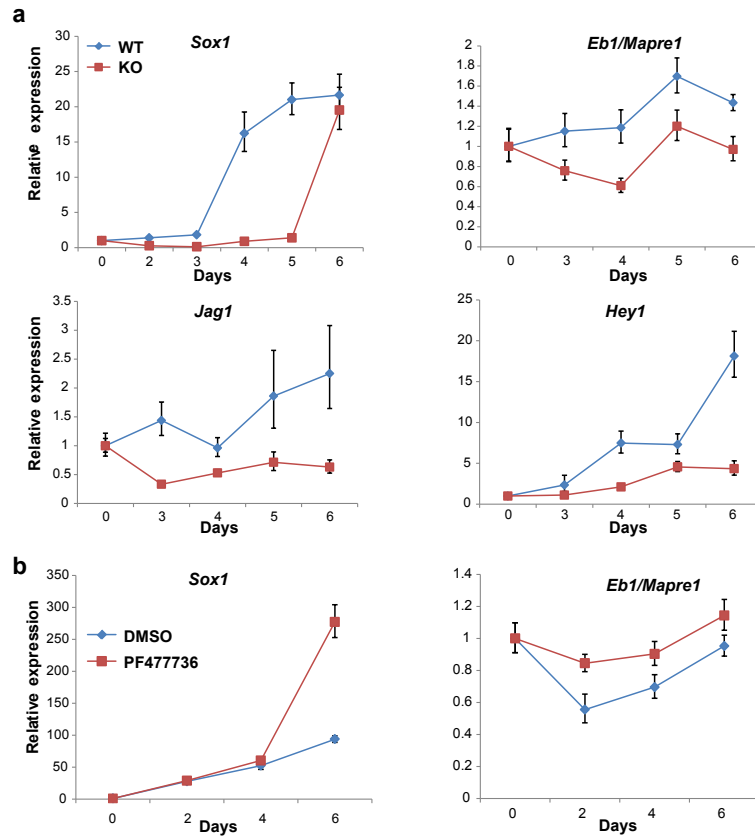

**Supplementary Figure 9. Regulation of neural differentiation timing and cell cycle by Fyn (replicate experiments for Fig. 4)**

(a) Biological replicate for Fig. 4a.

(b) Biological replicate for Fig. 4c.

**Supplementary Table 1. Real-time PCR primers**

| <b>Gene</b>   | <b>Sequence of Forward Primer</b> | <b>Sequence of Reverse Primer</b> |
|---------------|-----------------------------------|-----------------------------------|
| <i>Gapdh</i>  | GCCTCCGTGTTCTACC                  | CCTCAGTGTAGCCCAAGATG              |
| <i>Actb</i>   | ACCTTCTACAATGAGCTGCG              | CTGGATGGCTACGTACATGG              |
| <i>Zfp42</i>  | ACATCCTAACCCACGCAAAG              | CATTAAGACTACCCAGCCTGAG            |
| <i>Nodal</i>  | CCAACCATGCCTACATCCAG              | CTGCCATTGTCCACATAAAGC             |
| <i>Fgf5</i>   | AGAGTGGGCATCGGTTTC                | CTCGTATTCTACAATCCCCTG             |
| <i>Sox2</i>   | CACATGGCCCAGCACTAC                | CCCTCCCAATTCCCTTGTATC             |
| <i>Sox1</i>   | CTTCATGGTGTGGTCCCG                | TTGCTGATCTCCGAGTTGTG              |
| <i>Chord</i>  | AGTTCTATTGGCTGGGCTTG              | ATCTTTTACCACGCCCTGAG              |
| <i>Krt18</i>  | ACACCAACATCACAAGGCTG              | TTCCACAGTCAATCCAGAGC              |
| <i>Erk2</i>   | CTACACCAACCTCTCGTACATC            | CTCTTAGGGTTCTTTGACAGTAGG          |
| <i>Eomes</i>  | CGGCACCAAACCTGAGATGA              | CAGAACCACTTCCACGAAAAC             |
| <i>Klf4</i>   | ACTTGTGACTATGCAGGCTG              | ACAGTGGTAAGGTTTCTCGC              |
| <i>Tubb3</i>  | CGCCTTTGGACACCTATTCAG             | TTCTCACACTCTTTCCGCAC              |
| <i>Notch1</i> | ATGTCAATGTTTCGAGGACCAG            | TCACTGTTGCCTGTCTCAAG              |
| <i>Foxa2</i>  | CGGGACTTAACCTGTAACGGG             | TCATGTTGCTCACGGAAGAG              |
| <i>Pitx2</i>  | CAATCTCCGATACTTCCAGCC             | CCCACATCCTCATTCTTTCTCT            |
| <i>Pax6</i>   | CCCTCACCAACACGTACAG               | TCATAACTCCGCCCATTCAC              |
| <i>Nes</i>    | AAGTTCCCAGGCTTCTCTTG              | GTCTCAAGGGTATTAGGCAAGG            |
| <i>Mixl1</i>  | TTTCTGCCTTAGGTAACCTCTGAG          | CAGTGTGAGAGAAGGGAACC              |
| <i>Id1</i>    | ATGTGTTCCAGCCGACG                 | GGTAGTGTCTTTCCAGAGATC             |
| <i>Lefty1</i> | CACAAGTTGGTTTCGTTTCGC             | CATCGGGTGCCTTCAGTC                |
| <i>Lefty2</i> | CGTGAGGTCCCAGTATGTG               | CTCCATTCCGAACACTAGCAG             |
| <i>Ehmt2</i>  | ACCATGTCCAAACCTAGCAAC             | CTACCAGAGTTCAGCTTCCTC             |
| <i>Setdb1</i> | GGCTATGCTTCCTATGTCACCTC           | ATTGGGCGGTTTGGATAGG               |
| <i>Kdm4c</i>  | CCCTGTGTATCGTACTTTCCTG            | CTGTCCCTTTGTCTTCCCTC              |
| <i>Kdm1a</i>  | AGCTACAGAGTTTTGGGATGG             | GATTCCCTCCAAGACCTGTTAC            |
| <i>Ezh2</i>   | TCCCGTTAAAGACCCTGAATG             | TGAAAGTGCCATCCTGATCC              |
| <i>Ezh1</i>   | TCTTCCACGGCACCTATTTTC             | TTCTGTGCAGGGTTCATGAG              |
| <i>Kdm6b</i>  | GTCCACTTCCAACCTCATCTG             | AACCAATTCCAGCCTCCG                |
| <i>Chd3</i>   | GTCCTTGTACCTCTAAGCCTG             | CCTCTGCCTCCATCTTTTCC              |
| <i>Pou5f1</i> | AGTGGAAGCAACTCAGAGG               | AACTGTTCTAGCTCCTTCTGC             |
| <i>Kdm6a</i>  | GTGGAAGTAATGGAACGTC               | TGTGAACTCGGACCTTTGTG              |
| <i>Dnmt3b</i> | GTACCCCATCAGTTGACTTGAG            | TTGATCTTTCCCCACACGAG              |
| <i>Dnmt3a</i> | GGACTTTATGAGGGTACTGGC             | GATGTCCCTCTTGTCACTAACG            |
| <i>Dnmt1</i>  | GACCTACTTGAGAGCATCCAG             | TTCCCTTTCCCTTTGTTCCC              |
| <i>Stat3</i>  | GGCACCTTGATTGAGAGTC               | CGAAGGTTGTGCTGATAGAGG             |
| <i>Nanog</i>  | CAGAAAAACAGTGGTTGAAGACTAG         | GCAATGGATGCTGGGATACTC             |
| <i>Suz12</i>  | CTCAGGATATACATCGCCAACC            | GCTCCACTTCTCCATCTTCAG             |

**Supplementary Table 2. Fold enrichment of signaling genes in source,**

### target and eResponseNet nodes

| Gene set                       | Fold enriched |
|--------------------------------|---------------|
| Transition1.source             | 1.778932795   |
| Transition2.source             | 1.663701008   |
| Transition3.source             | 1.786104576   |
| Transition1.target             | 1.289667682   |
| Transition2.target             | 1.195727268   |
| Transition3.target             | 1.025077796   |
| Transition1.eResponseNet_nodes | 4.590911215   |
| Transition2.eResponseNet_nodes | 4.087956471   |
| Transition3.eResponseNet_nodes | 4.478995058   |

### Supplementary Table 3. Significance of interactions between a cell cycle checkpoint and a signaling pathway in the eResponseNet networks (1000 permutations)

| Cell cycle checkpoint | Signaling pathway | p-value |
|-----------------------|-------------------|---------|
| G1S                   | JAK-STAT          | 0       |
| G1S                   | Wnt               | 0       |
| G1S                   | Nodal             | 0.003   |
| G1S                   | Hedgehog          | 0.011   |
| G1S                   | Notch             | 0.016   |
| G1S                   | BMP               | 0.034   |
| G1S                   | FGF               | 0.053   |
| G2M                   | JAK-STAT          | 0       |
| G2M                   | Nodal             | 0.001   |
| G2M                   | Hedgehog          | 0.005   |
| G2M                   | BMP               | 0.021   |
| G2M                   | Wnt               | 0.051   |
| G2M                   | FGF               | 0.111   |
| G2M                   | Notch             | 0.169   |
| MG1                   | Hedgehog          | 0       |
| MG1                   | Notch             | 0       |
| MG1                   | BMP               | 0.048   |
| MG1                   | Wnt               | 0.268   |
| MG1                   | Nodal             | 0.391   |
| MG1                   | JAK-STAT          | 0.468   |
| MG1                   | FGF               | 0.58    |

### Supplementary Table 4. Hub genes in the eResponseNets and CSI

## networks

| <b>Network</b> | <b>Gene symbols</b>                                                                                                                                                                                                                                                                                                                                                                                                                  |
|----------------|--------------------------------------------------------------------------------------------------------------------------------------------------------------------------------------------------------------------------------------------------------------------------------------------------------------------------------------------------------------------------------------------------------------------------------------|
| eResponseNet   | <i>Rhog, Traf6, Smad4, Adcy5, Itgb5, Rac1, Rxra, Smad3, Src, Stx1a, Dlg4, Fyn, Hdac2, Itgav, Prkaca, Smad1, Sp1, Trp53, Ube2i, Akt1, Casp3, Cdk4, Cdkn1a, Ctnnb1, Ephb2, Fgfr1, Fn1, Gsk3b, Itgb1, Jak1, Jun, Junb, Mmp2, Pax6, Pik3cb, Pik3r3, Prkca, Rps6kb1, Sdc2, Thbs1, Vegfa, Ywhab, Acta1, App, Cdk5, Clasp2, Cltb, Dvl3, Gnai2, Grb2, Nup43, Pik3r1, Plcg2, Plk1, Prkce, Smarcd3, Tnfrsf1a, Ubqln4, Ywhag, Ywhaz, Zfp358</i> |
| CSI            | <i>Birc5, Chek2, Dtx3, Ascl1, Myh6, Stk36, Hey1, Bmpr1a, Dvl3, Fgf8, Gsk3b, Dll3, Bmp7, Haus4, Dll1, Fyn, Stmn1, Foxh1, Gdf1, Id1, Msx2, Mfng, Apc, Adam10</i>                                                                                                                                                                                                                                                                       |

Hubs are defined as the nodes (genes) with the degree  $k$  greater than 4 for eResponseNets and 20 for the CSI network corresponding to top 5% and 20%  $k$  in the networks, respectively.



## Supplementary References

- 1 Zappia, L., Phipson, B. & Oshlack, A. Splatter: Simulation Of Single-Cell RNA Sequencing Data. *bioRxiv*, 133173 (2017).
