# Supplementary material for: Inference of differentiation time for single cell transcriptomes using cell population reference data
Source: PubMed Central journal article supplement (PMC5707349; doi:10.1038/s41467-017-01860-2), 2017-11-30
Supplement: 41467_2017_1860_MOESM2_ESM.pdf [file 41467_2017_1860_MOESM2_ESM.pdf]

## **Description of Additional Supplementary Files**

File Name: Supplementary Data 1

Description: Functional annotations for clusters of cpDEGs,

File Name: Supplementary Data 2

Description: Fitted or predicted differentiation time T or t related genes sets,

File Name: Supplementary Data 3

Description: Functional annotations for clusters of t1~4-genes
